# Supplementary material for: Simple method for simultaneously achieving red and green up-conversion luminescence
Source: Royal Society of Chemistry journal article supplement (doi:10.1039/c7ra09330f), 2017-01-01
Supplement: c7ra09330f1.pdf [file c7ra09330f1.pdf]

## Support Information

### Sample Method for Simultaneously Achieving Red And Green Up-conversion Luminescence

Xiumei Yin, Hong Wang, Mingming Xing, Yao Fu, Ying Tian, Xixian Luo\*

(Physics Department, Dalian Maritime University, Dalian, Liaoning 116026, PR China)

### Experimental

**Materials:** All materials purchased were used as follows without further purification. 1-Octadecene (OM; 90%) and oleic acid (OA; 90%),  $\text{Y}(\text{CH}_3\text{COO})_3 \cdot 4\text{H}_2\text{O}$ ,  $\text{Yb}(\text{CH}_3\text{COO})_3$ , and  $\text{Er}(\text{CH}_3\text{COO})_3$  were purchased from Alfa Aesar. Ammonium fluoride ( $\text{NH}_4\text{F}$ ), sodium hydroxide ( $\text{NaOH}$ ), methanol, cyclo-hexane, and ethanol were purchased from Tianjinzhiyuan Chemical Reagent Co and used as received. All  $\text{Re}(\text{CH}_3\text{COO})_3$  were dissolved in deionized water,  $\text{NaOH}$  and  $\text{NH}_4\text{F}$  dissolved in methanol solution in advance to reduce the experimental error.

**Synthesis of  $\text{NaYF}_4: x\text{Er}^{3+}$  ( $x=5, 10, 25, 75$  mol%):** 3 mL oleic acid and 7 mL octadecene were added to the two vials respectively, and 2 mL (0.4 mmol)  $\text{Re}(\text{CH}_3\text{COO})_3$  (0.2 M) was added in proportion. The samples present pale yellow after heating to 150 °C and preservation for 45 min, a rare earth oleate precursor solution can be obtained while the sample was cooled to room temperature. 1 mL  $\text{NaOH}$  (1M) and 4 mL  $\text{NH}_4\text{F}$  (0.4 M) methanol mixture were added to the solution, insulated at 50 °C for 40 min. Vacuumed at 100 °C and argon was swap every 3 min to

balance bottle pressure. The solution was quickly heated (15 min) to 290 °C when bubbles no longer produced, kept warm for 1.5 h, and desired product can be obtained while cooled to room temperature. A certain amount of ethanol solution was added to the solution, centrifuged at 9000 rad/min for 6 min. The product was dissolved in 4 mL cyclohexane, 8 mL ethanol was added and centrifuged at 9000 rad/min for 6 min. Repeat the previous step with 4 mL ethanol and 4 mL methanol instead of 8 mL ethanol. The resulting sample was dissolved in 5 mL cyclohexane, sealed and stored in a glass vial at 4 °C.

### **Characterization**

Size and morphology of samples were measured by JEM-2100F high-resolution transmission electron microscopy (HRTEM). The UV spectra were measured by Edinburgh FS5 fluorescence spectrometer, power-tunable 980 nm (maximum power: 800 mW) and 1550 nm (maximum power: 800 mW) laser diodes (LD) were used as excitation sources.

**Table 1** Radiative decay time  $\tau$  ( $\mu\text{s}$ ) of  $^4\text{S}_{3/2}$  (550 nm),  $^4\text{F}_{9/2}$  (654 nm),  $^4\text{I}_{9/2}$  (800 nm),  $^4\text{I}_{11/2}$  (1000 nm), and  $^4\text{I}_{13/2}$  (1535 nm) in phosphors  $\text{NaYbF}_4:\text{Er}^{3+}$  samples under 980 and 1550 nm pulse LD

excitation.

|                     | 980 nm | 1550 nm |
|---------------------|--------|---------|
| $^4\text{S}_{3/2}$  | 9.75   | 6.54    |
| $^4\text{F}_{9/2}$  | 200.35 | 164.57  |
| $^4\text{I}_{9/2}$  | 69.61  | 103.29  |
| $^4\text{I}_{11/2}$ | 115.09 |         |
| $^4\text{I}_{13/2}$ | 470.69 | 485.66  |

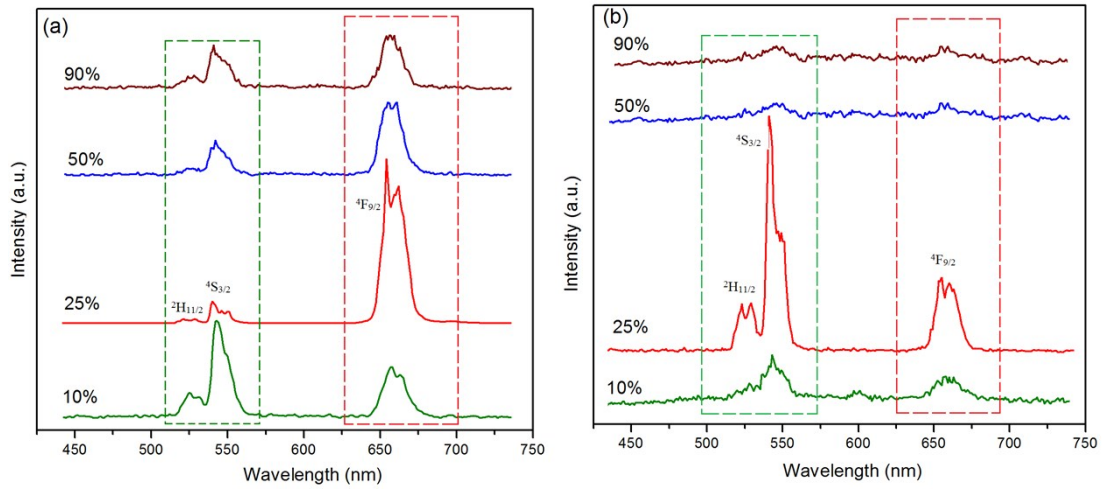

**Fig. S1** UCL spectra of  $\text{NaYbF}_4: x\text{Er}^{3+}$  ( $x=10, 25, 50, 90$  mol%) under 980 and 1550 nm

excitation.

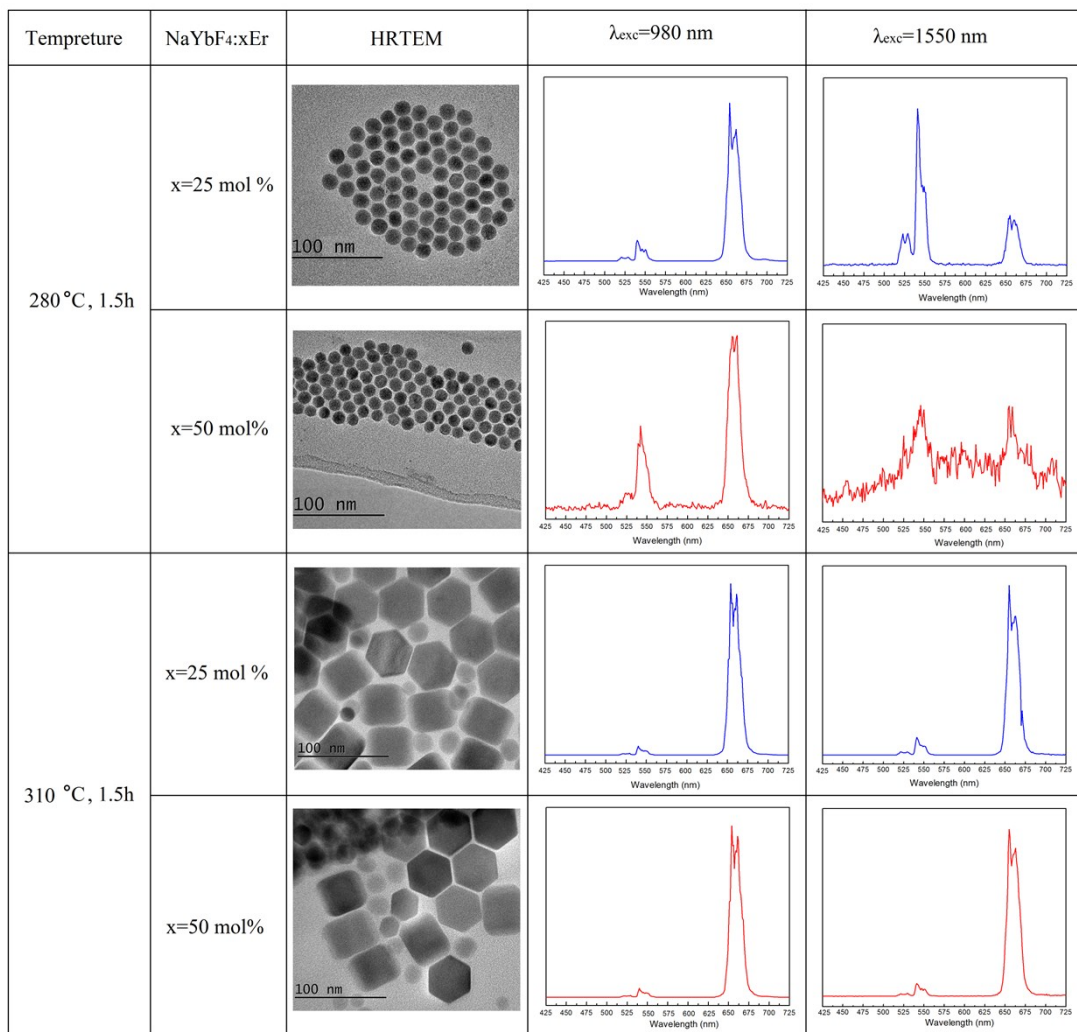

**Fig. S2** UCL spectra of NaYbF<sub>4</sub>:xEr<sup>3+</sup> (x=25, 50 mol%) prepared in differ condition (280, 310 °C for 1.5 h) under 980 and 1550 nm excitation.

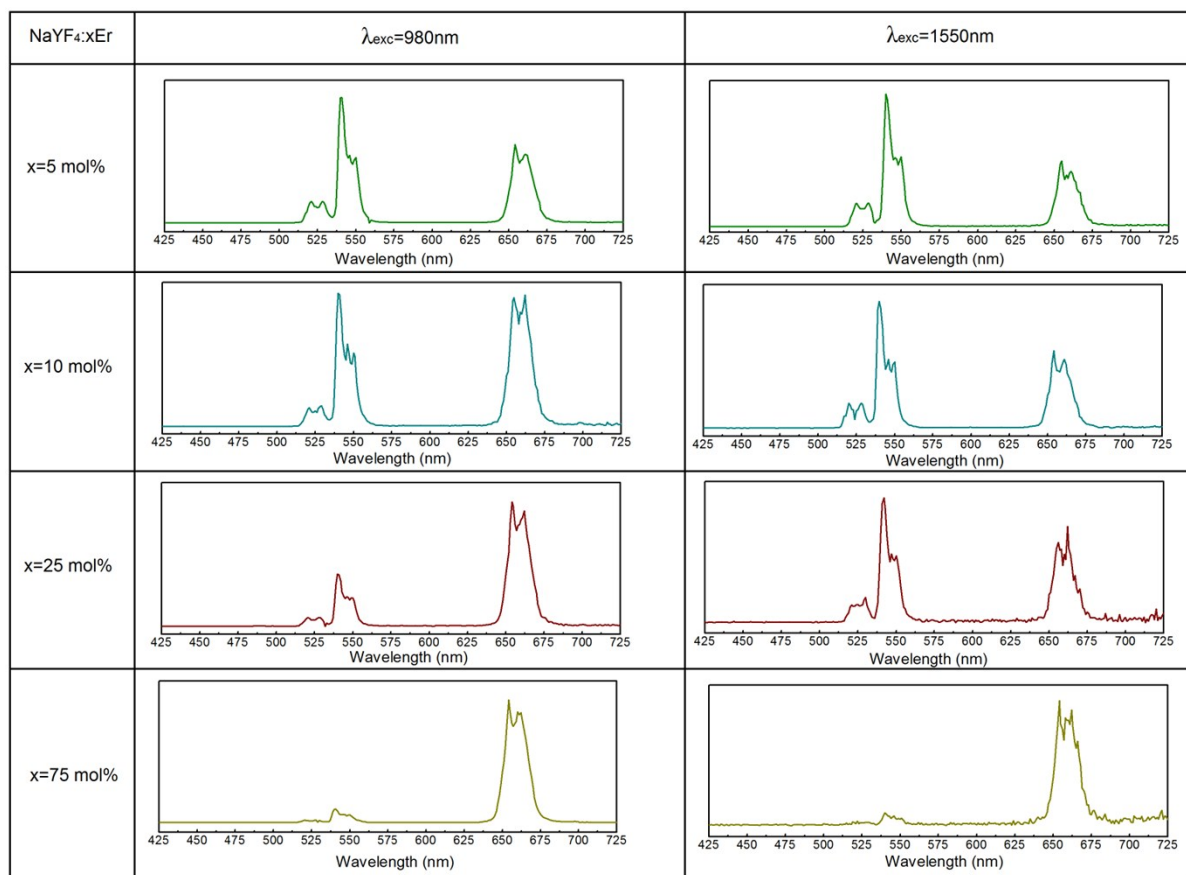

**Fig. S3** UCL spectra of NaYF<sub>4</sub>:xEr<sup>3+</sup> (x=5, 10, 25,75 mol%) under 980 and 1550 nm excitation.

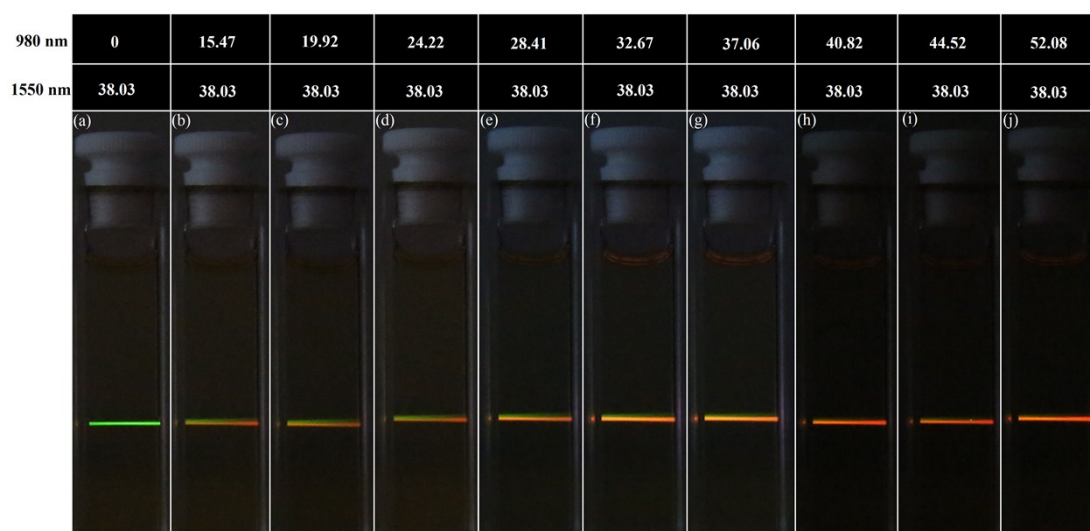

**Fig. S4** Multi-color photos of NaYbF<sub>4</sub>:25%Er<sup>3+</sup>, the excitation power density of 1550 nm is fixed at 38.03 mW/mm<sup>2</sup> while that of 980 nm are 0, 15.47, 19.92, 24.22, 28.41, 32.67, 37.06, 40.82, 44.52, and 52.08 mW/mm<sup>2</sup>, specific measurement methods is shown as below. (Canon EOS 5D

Mark III, Tv=1:320, Len: EF24-70mm f/2.8L II USM, Av= 2.8, ISO=12800 )

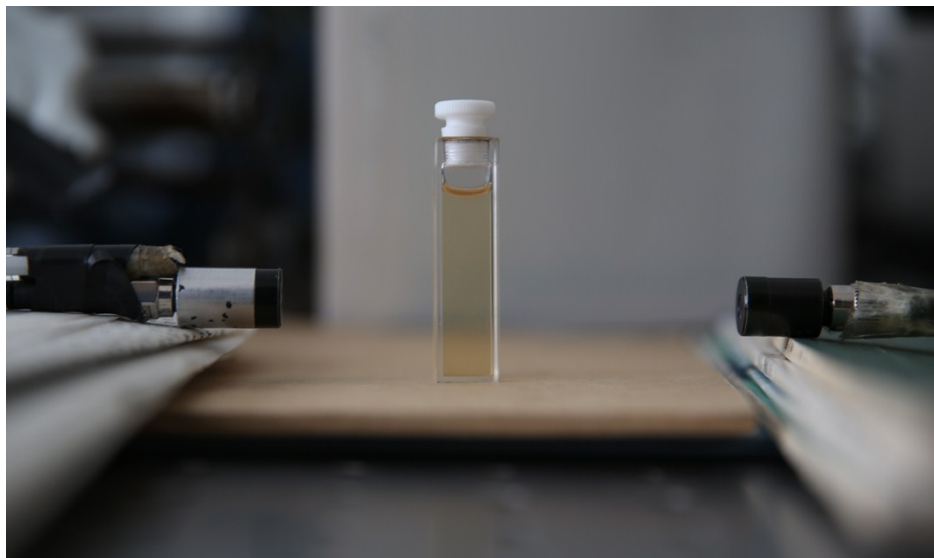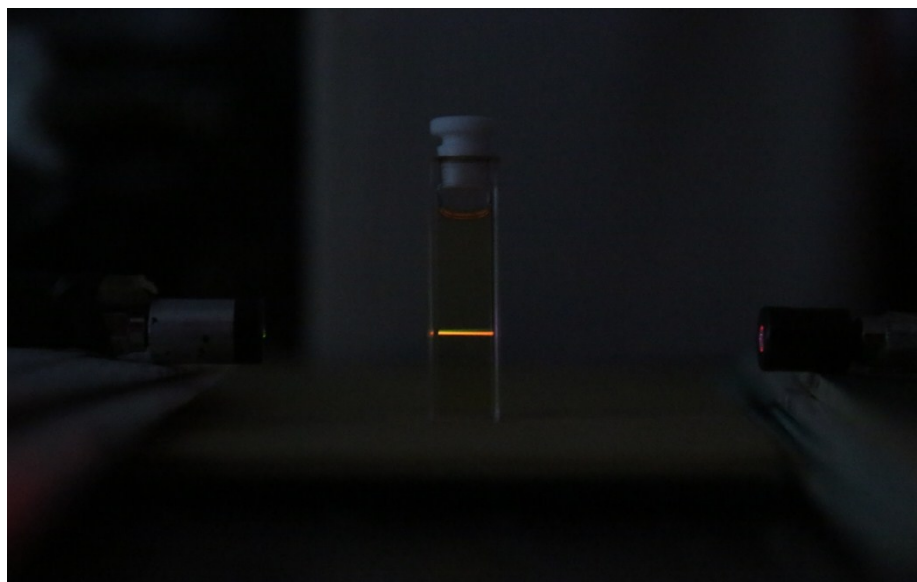

**Fig. S5** specific measurement methods of Fig. S4. (Canon EOS 5D Mark III, Tv=1:10, Len: EF24-70mm f/2.8L II USM, Av= 2.8, ISO=12800 )

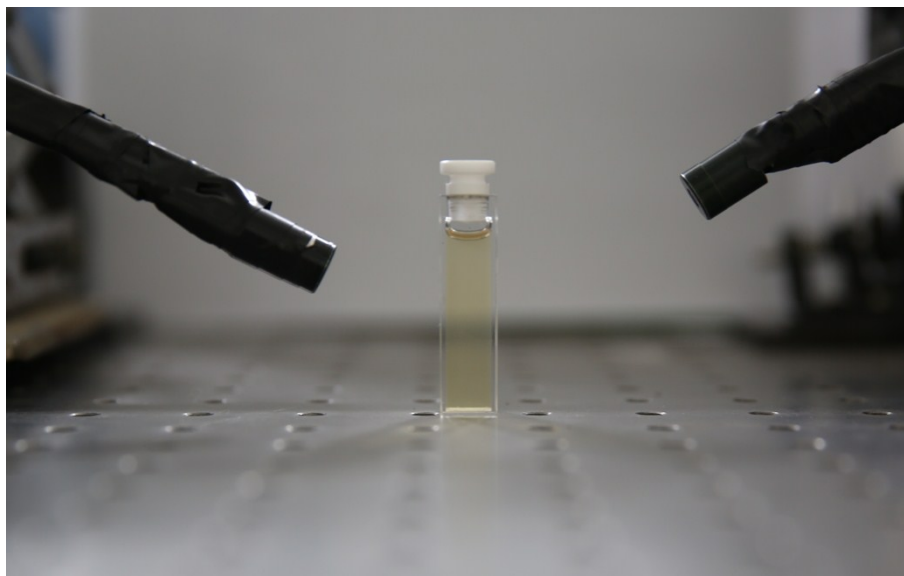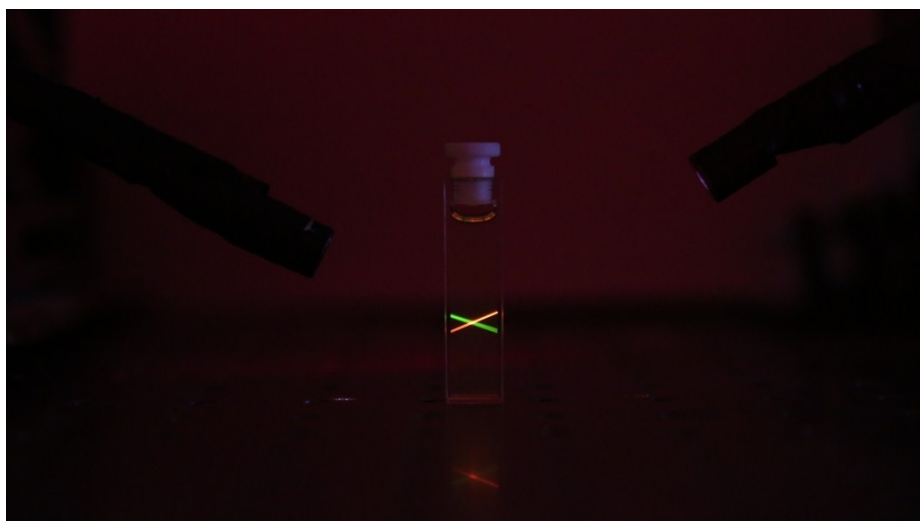

**Fig. S6** Specific measurement methods of Fig. 2b in the manuscript. (Canon EOS 5D Mark III,

Tv=1:10, Len: EF24-70mm f/2.8L II USM, Av= 2.8, ISO=12800 )
